# Supplementary material for: The emerging role of NG2 in pediatric diffuse intrinsic pontine glioma
Source: PubMed Central journal article supplement (PMC4494928; doi:10.18632/oncotarget.3716), 2015-03-30
Supplement: oncotarget-06-12141-s001.pdf [file oncotarget-06-12141-s001.pdf]

# The emerging role of NG2 in pediatric diffuse intrinsic pontine glioma

## Supplementary Material

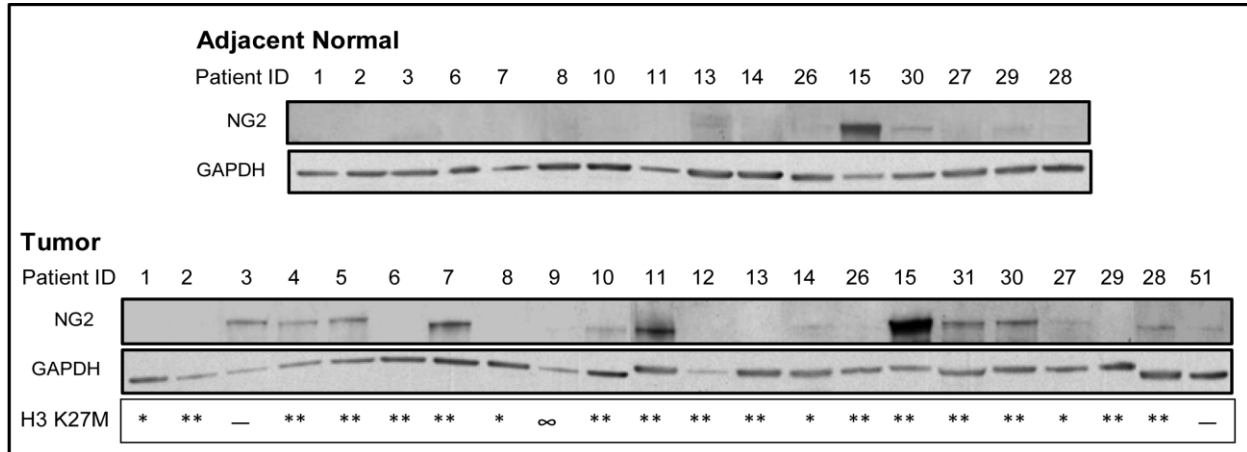

**Supplementary Figure 1: Western blot analysis of NG2 in human DIPG tumor and adjacent normal tissues and status of H3 mutation.** Western blot analysis validated NG2 expression in 13/22 (59%) of DIPG specimens tested. Adjacent normal specimens (n=16) were used as controls. Low NG2 expression was detectable in 4 normal specimens possibly due to infiltration of NG2 expressing cells. GAPDH was used for protein loading normalization. Histone 3 mutation status is given for histone 3.1 K27M mutation (\*), histone 3.3 K27M (\*\*) or wild type ( $\infty$ ). NG2 expression was detected in 100% of patients with H3 K27M mutations.

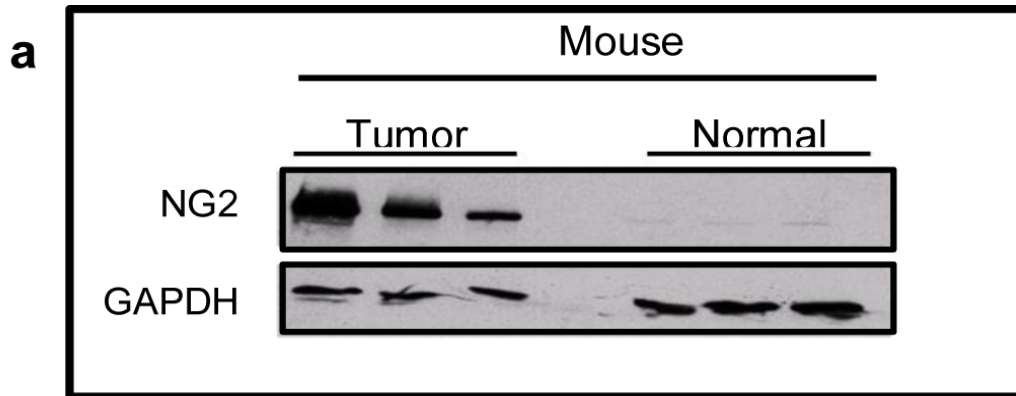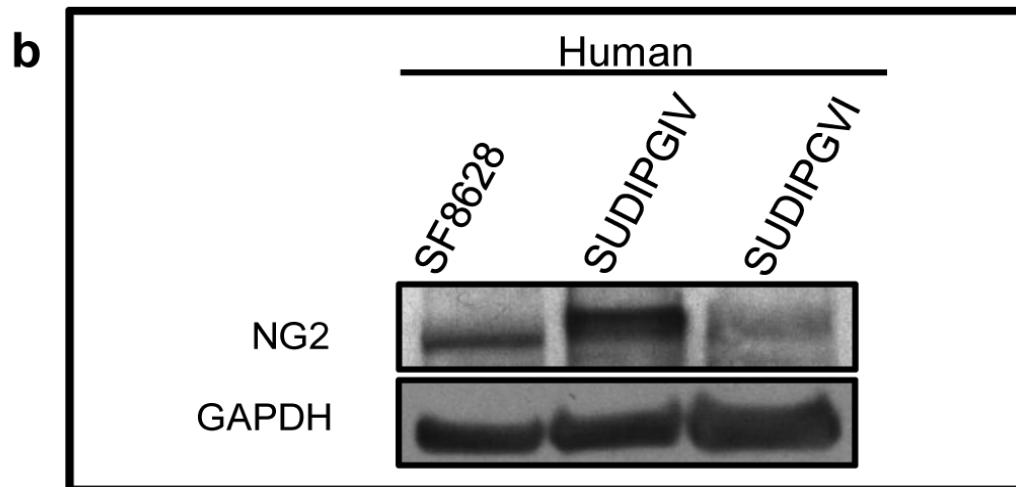

**Supplementary Figure 2: NG2 expression in PDGFB mouse tumor and human DIPG primary cells.** (a) Western blotting was performed using mouse normal and tumor tissues. High expression level of NG2 was detected in protein extracts from PDGFB mice (n=3) tumors compared to healthy pons (n=3) from age-matched mice. GAPDH was used for protein loading normalization. (b) NG2 expression is detected in three primary human DIPG cells.

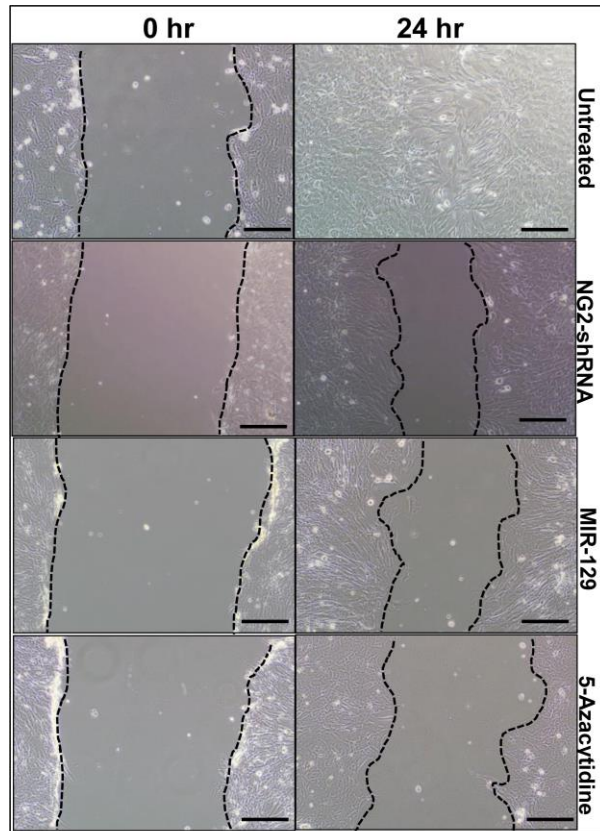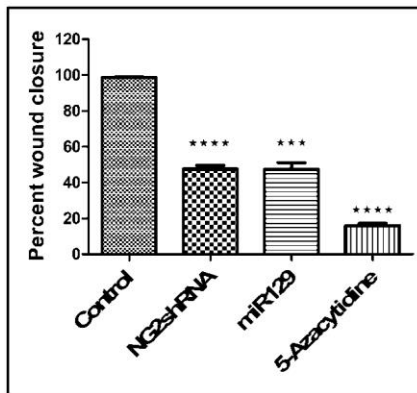

**Supplementary Figure 3: NG2 inhibition retards cellular migration *in vitro*.** To assess the role of NG2 in cellular migration, PDGFB adherent mouse tumor cells were expanded in culture and transfected with NG2-shRNA (stable), miR129-2 (transient) or treated with 5-Azacytidine. Scratch wound assay was performed and wound area was imaged and measured at 0 h and 24 h time intervals. Scale bar = 200  $\mu$ m. Quantitation of percent wound closure at 24 h as compared to 0 h (bottom panel).

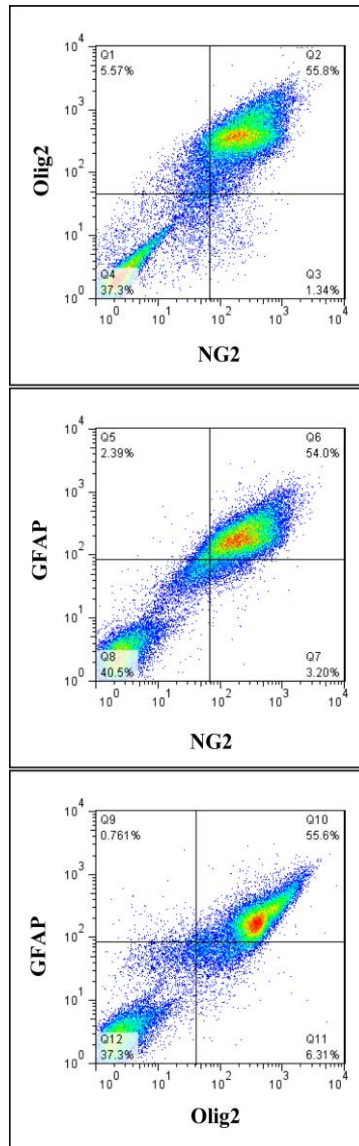

**Supplementary Figure 4: NG2 expressing cells lack terminal differentiation.** Primary neurospheres from PDGFB mouse tumor were fixed and immunostained using primary antibodies for NG2, GFAP, and Olig2 for flow cytometry analysis. Mouse primary cells co-express NG2 and Olig2 at 55.6%. Similarly, 54% of mouse neurospheres co-express both GFAP and NG2. Co-expression of astrocyte (GFAP) and oligodendrocyte marker (Olig2) is 55.6%. The robust co-expression of any two antibodies indicates the lesser degree of commitment of mouse tumor cells.

**Supplementary Table 1:** Human postmortem DIPG specimens used for IHC and molecular analysis. Missing information is indicated as n/a (not available).

| <b>Patient ID</b> | <b>Diagnosis</b> | <b>Gender</b> | <b>Age</b> | <b>H3.1 / H3.3<br/>Mutation status</b> | <b>Tumor</b> | <b>Normal</b> |
|-------------------|------------------|---------------|------------|----------------------------------------|--------------|---------------|
| 1                 | DIPG             | M             | 8y         | H3.1K27M                               | Brainstem    | Brainstem     |
| 2                 | DIPG             | F             | 6y         | H3.3K27M                               | Brainstem    | Brainstem     |
| 3                 | DIPG             | F             | 7y         | n/a                                    | Brainstem    | Brainstem     |
| 4                 | DIPG             | M             | 8y         | H3.3K27M                               | Brainstem    | n/a           |
| 5                 | DIPG             | M             | n/a        | H3.3K27M                               | Brainstem    | n/a           |
| 6                 | DIPG             | F             | 14y        | H3.3K27M                               | Brainstem    | Brainstem     |
| 7                 | DIPG             | F             | 5y         | H3.3K27M                               | Brainstem    | Brainstem     |
| 8                 | DIPG             | M             | n/a        | H3.1K27M                               | Brainstem    | Brainstem     |
| 9                 | DIPG             | F             | 4y         | WT                                     | Brainstem    | n/a           |
| 10                | DIPG             | M             | 8y         | H3.3K27M                               | Brainstem    | Brainstem     |
| 11                | DIPG             | M             | 8y         | H3.3K27M                               | Brainstem    | Brainstem     |
| 12                | DIPG             | n/a           | n/a        | H3.3K27M                               | Brainstem    | n/a           |
| 13                | DIPG             | M             | 21y        | H3.3K27M                               | Brainstem    | Frontal Lobe  |
| 14                | DIPG             | M             | 6y         | H3.1K27M                               | Brainstem    | Frontal lobe  |
| 15                | DIPG             | F             | 9y         | H3.3K27M                               | Brainstem    | Cerebellum    |
| 16 through 25     | DIPG             | n/a           | n/a        | n/a                                    | Brainstem    | -             |
| 26                | DIPG             | F             | 9y9m       | H3.3K27M                               | Brainstem    | Parietal lobe |
| 27                | DIPG             | M             | 5y6m       | H3.1K27M                               | Brainstem    | Frontal       |

|              |             |            |            |                 |                  |                     |
|--------------|-------------|------------|------------|-----------------|------------------|---------------------|
| <b>28</b>    | <b>DIPG</b> | <b>M</b>   | <b>4y</b>  | <b>H3.3K27M</b> | <b>Brainstem</b> | <b>Frontal Lobe</b> |
| <b>29</b>    | <b>DIPG</b> | <b>M</b>   | <b>8y</b>  | <b>H3.3K27M</b> | <b>Brainstem</b> | <b>Frontal</b>      |
| <b>30</b>    | <b>DIPG</b> | <b>F</b>   | <b>10y</b> | <b>H3.3K27M</b> | <b>Brainstem</b> | <b>Frontal Lobe</b> |
| <b>31</b>    | <b>DIPG</b> | <b>n/a</b> | <b>12y</b> | <b>H3.3K27M</b> | <b>Brainstem</b> | <b>n/a</b>          |
| <b>32-33</b> | <b>DIPG</b> | <b>n/a</b> | <b>n/a</b> | <b>n/a</b>      | <b>Brainstem</b> | <b>-</b>            |
| <b>51</b>    | <b>DIPG</b> | <b>F</b>   | <b>7y</b>  | <b>H3.3K27M</b> | <b>Brainstem</b> | <b>n/a</b>          |

**Supplementary Table 2:** Immunohistochemical assays assessing NG2 and PDGFR- $\alpha$

expression in formalin fixed DIPG specimens. NG2 and PDGFR- $\alpha$  staining were done by the automated immunohistochemistry Ventana Medical Systems and read by a pathologist. The rating parameters were as follows: (Negative): No membranous staining was seen; (+0.5): weak membranous staining was seen; (+1): moderate membranous staining was seen; (+2): strong membranous staining was seen.

| <b>Specimen ID</b> | <b>PDGFR-<math>\alpha</math></b> | <b>NG2</b>    |
|--------------------|----------------------------------|---------------|
|                    | <b>Rating</b>                    | <b>Rating</b> |
| <b>16</b>          | +1                               | Negative      |
| <b>17</b>          | +2                               | +1            |
| <b>18</b>          | N/A                              | +2            |
| <b>19</b>          | Negative                         | Negative      |
| <b>20</b>          | +2                               | Negative      |
| <b>21</b>          | Negative                         | +1            |
| <b>22</b>          | +1                               | +1            |
| <b>23</b>          | +2                               | +0.5          |
| <b>24</b>          | Negative                         | +1            |
| <b>25</b>          | +2                               | +2            |
| <b>32</b>          | N/A                              | +1            |
| <b>33</b>          | N/A                              | +2            |
